# Supplementary material for: Response to comment on 'Parasite defensive limb movements enhance acoustic signal attraction in male little torrent frogs'
Source: eLife. 2023 Oct 9;12:e90404. doi: 10.7554/eLife.90404 (PMC10561973; doi:10.7554/eLife.90404)
Supplement: Supplementary file 1. [file elife-90404-supp1.xlsx]

## Sheet: 1-data
ID	All	Noise(dB)
1	12	65.3
2	15	72.3
3	39	59
4	45	57
5	29	60.3
6	55	58.5
7	43	57
8	19	70.3
9	18	60
10	52	57
11	10	67.1
12	22	53.4
13	2	73.8
14	11	75.8
15	36	66.7
16	32	69.8
17	21	72
18	6	70.5
19	91	74.5
20	50	69.7
21	23	70
22	16	66
23	48	71.8
24	90	58.5
25	1	53.6
26	76	74.1
27	28	60.8
28	16	76.9
29	45	59
30	11	67
31	47	72.7
32	4	59.5
33	11	67.5
34	27	68.3
35	61	67.8
36	97	58.3
37	42	68.1
38	19	57.3
39	24	64.5
ID, male identity; All, overall movements; Noise, noise levels in natural habitat
